# Supplementary material for: Synergistic Optimization of Shape-Force and Dynamic Coupling Effect in Bending Roll Systems During accelerated rolling
Source: Research Square preprint supplement (doi:10.21203/rs.3.rs-6668267/v1), 2025-06-05
Supplement: Supplementary file 1 [file 579f071318cd0ca124576d91.xlsx]

## Sheet: Sheet1
The rolling force that varies over time
time	Rolling force	time	Rolling force	time	Rolling force	time	Rolling force	time	Rolling force
mm	N	mm	N	mm	N	mm	N	mm	N
	IRB:100KN		IRB:200KN		IRB:300KN		IRB:400KN		IRB:500KN
0	1908455	0	1808004	0	1732603	0	1665081	0	1612599
0.01	1908455	0.01	1808004	0.01	1732603	0.01	1665081	0.01	1612599
0.02074	1908455	0.02147	1808004	0.02074	1732603	0.02074	1665081	0.02147	1612599
0.03324	1908405	0.0325	1807804	0.0325	1729911	0.0325	1665071	0.03397	1612349
0.04206	1911558	0.04206	1808004	0.04279	1732603	0.04279	1665581	0.04206	1612359
0.05162	1886732	0.05088	1790329	0.05015	1711065	0.05015	1645448	0.05088	1594465
0.05824	1852595	0.05971	1765078	0.05824	1684142	0.05824	1623361	0.05897	1566282
0.07	1830871	0.06926	1744878	0.07	1662604	0.06926	1598820	0.06926	1548348
0.07882	1802941	0.07882	1724678	0.07809	1646450	0.07882	1579187	0.07882	1530413
0.08912	1778114	0.08985	1704477	0.08985	1619527	0.08985	1562008	0.08985	1507355
0.10162	1759494	0.10088	1691852	0.10162	1608758	0.10162	1549737	0.10162	1494545
0.11265	1743977	0.11191	1676702	0.11265	1587220	0.11191	1542375	0.11191	1486859
0.12441	1740874	0.12368	1664077	0.12441	1579143	0.12368	1532558	0.12441	1468924
0.13912	1722254	0.13838	1651452	0.13838	1571066	0.13838	1517834	0.13838	1453552
0.15162	1700530	0.15162	1638827	0.15088	1552220	0.15235	1498201	0.15088	1438180
0.16632	1678807	0.16559	1623676	0.16632	1533374	0.16632	1483476	0.16632	1425369
0.18177	1669497	0.18029	1618626	0.18177	1525297	0.18177	1478568	0.18103	1417683
0.195	1666393	0.19574	1611051	0.195	1519913	0.19574	1471205	0.195	1409997
0.20971	1660187	0.20897	1606001	0.21044	1514528	0.20897	1466297	0.20897	1407435
0.22	1650877	0.22	1600951	0.22074	1511836	0.22	1463843	0.22	1402311
When the bending force of the middle roll changes, the rolling force in the width direction												When the bending force of the working roll changes, the rolling force in the width direction
Distance from the center of the strip	Rolling pressure	Distance from the center of the strip	Rolling pressure	Distance from the center of the strip	Rolling pressure	Distance from the center of the strip	Rolling pressure	Distance from the center of the strip	Rolling pressure			Distance from the center of the strip	Rolling pressure	Distance from the center of the strip	Rolling pressure	Distance from the center of the strip	Rolling pressure	Distance from the center of the strip	Rolling pressure	Distance from the center of the strip	Rolling pressure
mm	MPa	mm	MPa	mm	MPa	mm	MPa	mm	MPa			mm	MPa	mm	MPa	mm	MPa	mm	MPa	mm	MPa
	IRB:100kn		IRB:200kn		IRB:300kn		IRB:400kn		IRB:500kn				WRB:-100kn		WRB: 0kn		WRB: 100kn		WRB: 200kn		WRB: 300kn
-454.13	752.326	-452.64	702.492	-450.151	652.658	-456.193	611.462	-454.704	570.93			-450.151	927.387	-449.109	859.444	-451.64	784.977	-452.64	702.492	-453.746	601.878
-415.408	735.714	-409.366	694.518	-424.471	657.973	-425.982	625.415	-415.408	602.824			-390.77	821.753	-385.196	761.502	-404.834	739.593	-409.366	694.518	-435.045	618.31
-371.601	715.781	-374.622	687.209	-376.133	660.631	-386.707	640.698	-383.686	621.429			-354.985	770.892	-342.9	730.986	-362.538	714.554	-374.622	687.209	-386.707	642.567
-336.858	703.156	-333.837	681.229	-338.369	662.625	-344.411	648.671	-342.9	638.04			-306.647	736.768	-312.689	720.031	-327.795	701.252	-333.837	681.229	-341.39	650.391
-283.988	687.907	-294.562	676.578	-285.498	664.618	-285.498	651.329	-285.498	644.684			-271.903	721.379	-277.946	704.382	-277.946	687.95	-294.562	676.578	-288.52	654.304
-246.224	681.229	-250.755	671.262	-247.734	664.618	-250.755	653.987	-250.755	648.007			-237.16	702.034	-240.181	692.645	-243.202	680.125	-250.755	671.262	-250.755	656.651
-214.502	676.578	-217.523	668.605	-214.502	663.953	-208.459	656.645	-216.012	651.993			-206.949	691.08	-205.438	683.255	-206.949	676.213	-217.523	668.605	-214.502	658.216
-178.248	672.591	-182.779	667.276	-181.269	663.9	-184.29	657.973	-182.779	653.987			-173.716	684.038	-178.248	678.56	-179.758	673.865	-182.779	667.276	-182.779	658.998
-149.547	669.269	-148.036	665.947	-151.057	663.269	-152.568	659.967	-151.057	657.309			-137.462	680.908	-141.994	675.43	-140.483	672.3	-148.036	665.947	-146.526	658.998
-120.846	668.605	-119.335	665.282	-119.335	663.229	-122.356	660.631	-122.356	658.638			-110.272	678.56	-110.272	672.3	-110.272	669.171	-119.335	665.282	-120.846	660.563
-83.0816	666.611	-80.0604	664.618	-80.0604	663.199	-81.571	661.296	-83.0816	659.967			-80.0604	673.865	-80.0604	670.736	-83.0816	667.606	-80.0604	664.618	-83.0816	661.346
-49.8489	666.611	-49.8489	663.953	-49.8489	662.625	-49.8489	660.631	-49.8489	659.967			-54.3807	672.3	-49.8489	668.388	-49.8489	666.041	-49.8489	663.953	-48.3384	662.128
-22.6586	665.947	-24.1692	663.953	-22.6586	662.425	-22.6586	661.296	-22.6586	660.631			-19.6375	670.736	-19.6375	667.606	-19.6375	665.258	-24.1692	663.953	-22.6586	662.128
22.6586	665.947	24.1692	663.953	22.6586	662.625	22.6586	661.296	22.6586	660.631			19.6375	670.736	19.6375	667.606	19.6375	665.258	24.1692	663.953	22.6586	662.128
49.8489	666.611	49.8489	663.953	49.8489	662.625	49.8489	660.631	49.8489	659.967			54.3807	672.3	49.8489	668.388	49.8489	666.041	49.8489	663.953	48.3384	662.128
83.0816	666.611	80.0604	664.618	80.0604	663.199	81.571	661.296	83.0816	659.967			80.0604	673.865	80.0604	670.736	83.0816	667.606	80.0604	664.618	83.0816	661.346
120.846	668.605	119.335	665.282	119.335	663.229	122.356	660.631	122.356	658.638			110.272	678.56	110.272	672.3	110.272	669.171	119.335	665.282	120.846	660.563
149.547	669.269	148.036	665.947	151.057	663.269	152.568	659.967	151.057	657.309			137.462	680.908	141.994	675.43	140.483	672.3	148.036	665.947	146.526	658.998
178.248	672.591	182.779	667.276	181.269	663.9	184.29	657.973	182.779	653.987			173.716	684.038	178.248	678.56	179.758	673.865	182.779	667.276	182.779	658.998
214.502	676.578	217.523	668.605	214.502	663.953	208.459	656.645	216.012	651.993			206.949	691.08	205.438	683.255	206.949	676.213	217.523	668.605	214.502	658.216
246.224	681.229	250.755	671.262	247.734	664.618	250.755	653.987	250.755	648.007			237.16	702.034	240.181	692.645	243.202	680.125	250.755	671.262	250.755	656.651
283.988	687.907	294.562	676.578	285.498	664.618	285.498	651.329	285.498	644.684			271.903	721.379	277.946	704.382	277.946	687.95	294.562	676.578	288.52	654.304
336.858	703.156	333.837	681.229	338.369	662.625	344.411	648.671	342.9	638.04			306.647	736.768	312.689	720.031	327.795	701.252	333.837	681.229	341.39	650.391
371.601	715.781	374.622	687.209	376.133	660.631	386.707	640.698	383.686	621.429			354.985	770.892	342.9	730.986	362.538	714.554	374.622	687.209	386.707	642.567
415.408	735.714	409.366	694.518	424.471	657.973	425.982	625.415	415.408	602.824			390.77	821.753	385.196	761.502	404.834	739.593	409.366	694.518	435.045	618.31
454.13	752.326	452.64	702.492	450.151	652.658	456.193	611.462	454.704	570.93			450.151	927.387	449.109	859.444	451.64	784.977	452.64	702.492	453.746	601.878
The plate shape value when the bending force of the middle roller changes												The plate shape value when the bending force of the working roller changes
Distance from the center of the strip	Flatness of the strip	Distance from the center of the strip	Flatness of the strip	Distance from the center of the strip	Flatness of the strip	Distance from the center of the strip	Flatness of the strip	Distance from the center of the strip	Flatness of the strip			Distance from the center of the strip	Flatness of the strip	Distance from the center of the strip	Flatness of the strip	Distance from the center of the strip	Flatness of the strip	Distance from the center of the strip	Flatness of the strip	Distance from the center of the strip	Flatness of the strip
mm	I	mm	I	mm	I	mm	I	mm	I			mm	I	mm	I	mm	I	mm	I	mm	I
	IRB:100KN		IRB:200KN		IRB:300KN		IRB:400KN		IRB:500KN				WRB:-100kn		WRB: 0kn		WRB: 100kn		WRB: 200kn		WRB: 300kn
-494.083	-2.25455	-494.083	-3.61818	-494.083	-4.87273	-494.083	-6.23636	-494.083	-7.49091			-494.083	2.09859	-494.083	0.21695	-498.489	-1.72678	-494.083	-3.61818	-494.083	-6.14208
-456.608	-1.30909	-456.608	-2.25118	-456.608	-3.4	-456.608	-4.36364	-456.608	-5.54545			-462.099	1.8662	-459.214	0.46102	-468.278	-0.89618	-456.608	-2.25118	-466.767	-4.17486
-417.16	-0.47273	-417.16	-1.24545	-417.16	-2.09091	-417.16	-2.68364	-417.16	-3.42727			-421.283	1.61268	-419.94	0.66441	-430.514	-0.15301	-417.16	-1.24545	-421.45	-2.53552
-371.795	0.52727	-371.795	-0.10836	-371.795	-0.61818	-371.795	-1.04546	-371.795	-1.43636			-376.093	1.46479	-365.559	0.96949	-370.091	0.63388	-371.795	-0.10836	-368.58	-0.8306
-324.458	1.13182	-324.458	1.01818	-324.458	0.90909	-324.458	0.64546	-324.458	0.47273			-320.7	1.27465	-323.263	1.2339	-318.731	1.0929	-324.458	1.01818	-323.263	0.61202
-283.037	1.4	-283.037	1.50909	-283.037	1.67273	-283.037	1.83636	-283.037	2			-281.341	1.08451	-280.967	1.29492	-274.924	1.44262	-283.037	1.50909	-283.988	1.83607
-241.617	1.61818	-241.617	1.77273	-241.617	1.94545	-241.617	2.21818	-241.617	2.49091			-241.983	1	-235.65	1.39661	-237.16	1.61749	-241.617	1.77273	-235.65	2.38251
-198.225	1.83182	-198.225	2	-198.225	2.21818	-198.225	2.6	-198.225	2.92727			-196.793	0.89437	-194.864	1.47797	-193.353	1.81421	-198.225	2	-193.353	2.66667
-148.915	2.07545	-148.915	2.27273	-148.915	2.54545	-148.915	2.87273	-148.915	3.2			-148.688	0.76761	-149.547	1.53898	-148.036	1.94536	-148.915	2.27273	-145.015	2.92896
-109.467	2.25455	-109.467	2.43636	-109.467	2.65455	-109.467	3.03636	-109.467	3.41818			-109.329	0.70423	-105.74	1.6	-104.23	2.05464	-109.467	2.43636	-104.23	3.10383
-64.103	2.4364	-64.103	2.65455	-64.103	2.87273	-64.103	3.2	-64.103	3.58182			-68.513	0.61972	-69.486	1.62034	-64.9547	2.12022	-64.103	2.65455	-66.4653	3.1694
-20.71	2.61818	-20.71	2.81818	-20.71	2.98182	-20.71	3.30909	-20.71	3.63636			-20.408	0.55634	-21.148	1.66102	-21.148	2.16393	-20.71	2.81818	-22.6586	3.19126
21.775	2.61818	21.775	2.81818	21.775	2.98182	21.775	3.30909	21.775	3.63636			20.408	0.55634	21.148	1.66102	21.148	2.16393	21.775	2.81818	22.6586	3.19126
65.085	2.4364	65.085	2.65455	65.085	2.87273	65.085	3.2	65.085	3.58182			68.513	0.61972	69.486	1.62034	64.9547	2.12022	65.085	2.65455	66.4653	3.1694
110.533	2.25455	110.533	2.43636	110.533	2.65455	110.533	3.03636	110.533	3.41818			109.329	0.70423	105.74	1.6	104.23	2.05464	110.533	2.43636	104.23	3.10383
149.897	2.07545	149.897	2.27273	149.897	2.54545	149.897	2.87273	149.897	3.2			148.688	0.76761	149.547	1.53898	148.036	1.94536	149.897	2.27273	145.015	2.92896
199.29	1.83182	199.29	2	199.29	2.21818	199.29	2.6	199.29	2.92727			196.793	0.89437	194.864	1.47797	193.353	1.81421	199.29	2	193.353	2.66667
242.917	1.61818	242.917	1.77273	242.917	1.94545	242.917	2.21818	242.917	2.49091			241.983	1	235.65	1.39661	237.16	1.61749	242.917	1.77273	235.65	2.38251
284.392	1.4	284.392	1.50909	284.392	1.67273	284.392	1.83636	284.392	2			281.341	1.08451	280.967	1.29492	274.924	1.44262	284.392	1.50909	283.988	1.83607
325.84	1.13182	325.84	1.01818	325.84	0.90909	325.84	0.64546	325.84	0.47273			320.7	1.27465	323.263	1.2339	318.731	1.0929	325.84	1.01818	323.263	0.61202
372.233	0.52727	372.233	-0.10836	372.233	-0.61818	372.233	-1.04546	372.233	-1.43636			376.093	1.46479	365.559	0.96949	370.091	0.63388	372.233	-0.10836	368.58	-0.8306
418.542	-0.47273	418.542	-1.24545	418.542	-2.09091	418.542	-2.68364	418.542	-3.42727			421.283	1.61268	419.94	0.66441	430.514	-0.15301	418.542	-1.24545	421.45	-2.53552
457.963	-1.30909	457.963	-2.25118	457.963	-3.4	457.963	-4.36364	457.963	-5.54545			462.099	1.8662	459.214	0.46102	468.278	-0.89618	457.963	-2.25118	466.767	-4.17486
494.383	-2.25455	494.383	-3.61818	494.383	-4.87273	494.383	-6.23636	494.383	-7.49091			494.083	2.09859	494.083	0.21695	498.489	-1.72678	494.383	-3.61818	494.083	-6.14208
The thickness along the width direction when the bending force of the middle roller changes												The thickness along the width direction when the bending force of the middle roller changes
Distance from the center of the strip	Thickness	Distance from the center of the strip	Thickness	Distance from the center of the strip	Thickness	Distance from the center of the strip	Thickness	Distance from the center of the strip	Thickness			Distance from the center of the strip	Thickness	Distance from the center of the strip	Thickness	Distance from the center of the strip	Thickness	Distance from the center of the strip	Thickness	Distance from the center of the strip	Thickness
mm	mm	mm	mm	mm	mm	mm	mm	mm	mm			mm	mm	mm	mm	mm	mm	mm	mm	mm	mm
	IRB:100KN		IRB:200KN		IRB:300KN		IRB:400KN		IRB:500KN				WRB:-100kn		WRB: 0kn		WRB: 100kn		WRB: 200kn		WRB: 300kn
-473.394	1.97634	-473.394	2.00494	-472.56	2.03728	-473.394	2.07438	-482.569	2.10366			-474.713	1.86495	-474.713	1.91215	-474.713	1.96262	-474.713	2.00349	-474.713	2.05367
-458.881	1.9816	-460.55	2.0097	-464.22	2.04409	-460.55	2.07881	-471.56	2.11115			-464.894	1.86963	-464.894	1.91809	-464.894	1.96869	-464.894	2.00926	-464.894	2.05941
-433.028	1.98315	-431.193	2.00664	-444.037	2.03694	-433.028	2.06894	-418.349	2.08766			-435.353	1.87617	-425.353	1.92302	-435.353	1.96815	-430.514	2.00672	-435.353	2.04831
-400	1.98315	-401.835	2.00562	-407.339	2.02911	-405.505	2.06009	-388.991	2.07949			-403.323	1.89486	-395.834	1.9307	-404.834	1.96862	-404.079	2.00498	-404.834	2.04007
-374.312	1.98451	-370.642	2.00562	-381.651	2.02366	-379.817	2.05362	-352.294	2.06791			-365.448	1.92119	-368.474	1.94753	-376.04	1.97203	-373.867	2.00548	-376.04	2.03614
-335.78	1.98962	-333.945	2.00732	-335.78	2.02026	-337.615	2.04613	-326.606	2.06111			-333.67	1.94237	-338.209	1.96102	-333.67	1.98305	-336.858	2.00722	-332.156	2.0334
-297.248	1.99677	-302.752	2.01038	-300.917	2.02026	-302.752	2.04	-291.743	2.05396			-292.812	1.96356	-292.812	1.97458	-298.865	1.99068	-304.918	2.01017	-300.378	2.0322
-256.881	2.00494	-266.055	2.01209	-264.22	2.02026	-260.55	2.03523	-255.046	2.04477			-251.955	1.9822	-250.441	1.98814	-253.468	1.99831	-264.061	2.01186	-262.547	2.02966
-225.688	2.00936	-227.523	2.01481	-220.183	2.02196	-218.349	2.03047	-220.183	2.03796			-218.663	1.99153	-217.15	1.99746	-217.15	2.00593	-229.256	2.01441	-220.177	2.02627
-177.982	2.01413	-181.651	2.01685	-181.651	2.02162	-187.156	2.02706	-177.982	2.03217			-176.293	2	-177.806	2.00678	-182.346	2.01017	-182.346	2.0161	-180.832	2.02373
-143.119	2.01515	-144.954	2.01685	-137.615	2.01991	-144.954	2.02332	-143.119	2.02672			-143.001	2.00508	-138.462	2.01017	-139.975	2.01356	-144.515	2.01695	-143.001	2.02203
-106.422	2.01549	-108.257	2.01719	-104.587	2.02026	-106.422	2.02196	-102.752	2.02434			-108.197	2.00847	-106.683	2.01102	-106.683	2.01356	-108.197	2.01695	-106.683	2.02034
-66.055	2.01583	-62.3853	2.01719	-62.3853	2.01923	-60.5505	2.02196	-56.8807	2.02366			-58.2598	2.01102	-58.2598	2.01356	-59.773	2.01525	-58.2598	2.0178	-58.2598	2.02034
-23.8532	2.01651	-20.1835	2.01753	-18.3486	2.01889	-20.1835	2.0223	-16.5138	2.024			-21.942	2.01186	-21.942	2.01356	-21.942	2.0161	-21.942	2.01864	-18.9155	2.01949
12.844	2.01617	27.5229	2.01821	25.6881	2.01923	22.0183	2.02128	20.1835	2.02366			21.942	2.01186	21.942	2.01356	21.942	2.0161	21.942	2.01864	18.9155	2.01949
58.7156	2.01651	62.3853	2.01753	64.2202	2.01889	60.5505	2.0223	58.7156	2.024			58.2598	2.01102	58.2598	2.01356	59.773	2.01525	58.2598	2.0178	58.2598	2.02034
110.092	2.01583	113.761	2.01821	110.092	2.01991	110.092	2.02162	102.752	2.02434			108.197	2.00847	106.683	2.01102	106.683	2.01356	108.197	2.01695	106.683	2.02034
148.624	2.01447	146.789	2.01719	141.284	2.01991	141.284	2.02366	144.954	2.02638			143.001	2.00508	138.462	2.01017	139.975	2.01356	144.515	2.01695	143.001	2.02203
183.486	2.01379	187.156	2.01617	183.486	2.02094	179.817	2.02706	179.817	2.03217			176.293	2	177.806	2.00678	182.346	2.01017	182.346	2.0161	180.832	2.02373
225.688	2.0097	233.028	2.01481	218.349	2.02128	222.018	2.03047	218.349	2.03864			218.663	1.99153	217.15	1.99746	217.15	2.00593	229.256	2.01441	220.177	2.02627
256.881	2.00562	260.55	2.01243	264.22	2.02026	260.55	2.0366	260.55	2.04545			251.955	1.9822	250.441	1.98814	253.468	1.99831	264.061	2.01186	262.547	2.02966
302.752	1.99711	300.917	2.01038	300.917	2.0206	300.917	2.04034	293.578	2.0543			292.812	1.96356	292.812	1.97458	298.865	1.99068	304.918	2.01017	300.378	2.0322
341.284	1.98996	337.615	2.008	343.119	2.02026	335.78	2.04579	326.606	2.06111			333.67	1.94237	338.209	1.96102	333.67	1.98305	336.858	2.00722	332.156	2.0334
372.477	1.98519	374.312	2.0063	381.651	2.02298	383.486	2.05464	352.294	2.06723			365.448	1.92119	368.474	1.94753	376.04	1.97203	373.867	2.00548	376.04	2.03614
396.33	1.98281	407.339	2.00596	411.009	2.02877	403.67	2.06043	387.156	2.07949			403.323	1.89486	395.834	1.9307	404.834	1.96862	404.079	2.00498	404.834	2.04007
431.193	1.98043	434.862	2.00664	444.037	2.03728	434.862	2.06894	416.514	2.088			435.353	1.87617	425.353	1.92302	435.353	1.96815	430.514	2.00672	435.353	2.04831
458.55	1.9816	464.22	2.0097	464.22	2.04443	462.385	2.07847	471.56	2.11115			464.894	1.86963	464.894	1.91809	464.894	1.96869	464.894	2.00926	464.894	2.05941
473.394	1.97634	473.394	2.00391	472.229	2.0366	473.394	2.07404	482.569	2.10366			474.713	1.86495	474.713	1.91215	474.713	1.96262	474.713	2.00349	474.713	2.05367
The contact pressure between the working roll and the intermediate roll when the bending force of the intermediate roll changes												The contact pressure between the working roll and the intermediate roll when the bending force of the intermediate roll changes
Distance from the center of support roller	Contact pressures	Distance from the center of support roller	Contact pressures	Distance from the center of support roller	Contact pressures	Distance from the center of support roller	Contact pressures	Distance from the center of support roller	Contact pressures			Distance from the center of support roller	Contact pressures	Distance from the center of support roller	Contact pressures	Distance from the center of support roller	Contact pressures	Distance from the center of support roller	Contact pressures	Distance from the center of support roller	Contact pressures
mm	MPa	mm	MPa	mm	MPa	mm	MPa	mm	MPa			mm	MPa	mm	MPa	mm	MPa	mm	MPa	mm	MPa
	WRB:100kn		WRB:200kn		WRB:300kn		WRB:400kn		WRB:500kn				WRB:-100kn		WRB: 0kn		WRB: 100kn		WRB: 200kn		WRB: 300kn
-692.082	129.927	-692.082	124	-692.082	114	-692.082	96	-692.082	65.6804			-700.953	25.5738	-691.906	56.7213	-691.906	91.4754	-692.082	114	-694.168	126.557
-629.369	137.206	-624.89	133.516	-622.65	127.506	-627.129	116.051	-631.609	95.7247			-617.27	77.0492	-619.532	92.1311	-619.532	115.41	-622.65	127.506	-624.055	134.426
-566.656	140.918	-566.656	138.519	-568.896	134.886	-575.615	126.177	-566.656	113.943			-558.465	99.3443	-558.465	111.148	-574.297	124.918	-568.896	134.886	-560.727	138.689
-481.546	145.358	-481.546	144.405	-474.826	143.519	-477.066	139.342	-479.306	134.718			-474.782	124.918	-465.735	132.459	-467.997	139.672	-474.826	143.519	-479.305	145.574
-389.716	148.196	-387.476	148.427	-387.476	149.089	-389.716	147.443	-387.476	147.823			-384.313	147.213	-393.36	148.525	-379.79	148.197	-387.476	149.089	-391.099	148.525
-275.489	151.108	-275.489	152.449	-277.729	154.241	-273.249	154.329	-277.729	159.009			-275.751	164.262	-275.751	161.967	-268.966	155.738	-277.729	154.241	-271.228	151.475
-176.94	152.345	-172.461	154.215	-172.461	156.747	-172.461	157.772	-170.221	164.763			-171.712	172.787	-176.236	168.197	-173.974	158.361	-172.461	156.747	-173.974	153.115
0	152.854	0	155	0	157.861	0	160.203	0	166.68			4.701	177.705	2.439	170.492	-2.084	162.295	0	157.861	4.701	153.77
163.502	152.345	161.262	154.019	172.461	156.747	163.502	157.975	165.741	164.443			171.712	172.787	176.236	168.197	173.974	158.361	172.461	156.747	173.974	153.115
266.53	151.035	273.249	152.253	268.77	154.658	268.77	155.544	271.009	159.649			275.751	164.262	275.751	161.967	268.966	155.738	268.77	154.658	271.228	151.475
380.76	148.487	383	148.918	376.28	149.089	378.52	146.835	383	147.503			384.313	147.213	393.36	148.525	379.79	148.197	376.28	149.089	391.099	148.525
468.11	145.503	470.35	144.896	479.31	143.658	472.59	138.734	461.39	134.079			474.782	124.918	465.735	132.459	467.997	139.672	479.31	143.658	479.305	145.574
562.18	140.991	564.42	138.715	559.94	134.468	568.9	125.975	566.66	112.984			558.465	99.3443	558.465	111.148	574.297	124.918	559.94	134.468	560.727	138.689
622.65	137.133	618.17	133.516	629.37	127.785	620.41	115.848	627.13	97.3228			617.27	77.0492	619.532	92.1311	619.532	115.41	629.37	127.785	624.055	134.426
692.08	129.854	692.08	124.196	692.08	114.278	692.08	96	692.08	66			700.953	25.5738	691.906	56.7213	691.906	91.4754	692.08	114.278	694.168	126.557
The contact pressure between the intermediate roll and the backup roll when the bending force of the intermediate roll changes.												The contact pressure between the intermediate roll and the backup roll when the bending force of the intermediate roll changes.
Distance from the center of support roller	Contact pressures	Distance from the center of support roller	Contact pressures	Distance from the center of support roller	Contact pressures	Distance from the center of support roller	Contact pressures	Distance from the center of support roller	Contact pressures			Distance from the center of support roller	Contact pressures	Distance from the center of support roller	Contact pressures	Distance from the center of support roller	Contact pressures	Distance from the center of support roller	Contact pressures	Distance from the center of support roller	Contact pressures
mm	MPa	mm	MPa	mm	MPa	mm	MPa	mm	MPa			mm	MPa	mm	MPa	mm	MPa	mm	MPa	mm	MPa
	WRB:100kn		WRB:200kn		WRB:300kn		WRB:400kn		WRB:500kn				WRB:-100kn		WRB: 0kn		WRB: 100kn		WRB: 200kn		WRB: 300kn
-687.034	149.358	-689.029	179.906	-689.029	202.441	-689.029	222.786	-689.029	244.695			-687.137	157.176	-687.137	170.665	-690.456	164.619	-689.029	179.906	-683.817	190.199
-606.239	124.324	-606.305	143.599	-624.464	170.516	-606.305	189.296	-588.146	195.243			-617.427	129.249	-610.788	137.619	-610.788	133.898	-606.305	143.599	-600.83	153.896
-555.841	106.146	-559.899	126.385	-565.952	150.172	-543.758	160.188	-517.528	164.57			-570.954	114.352	-567.635	121.793	-570.954	118.073	-559.899	126.385	-551.037	131.09
-475.505	88.164	-479.193	98.529	-491.299	120.125	-456.999	120.751	-434.805	126.698			-501.245	90.1457	-484.647	94.792	-491.286	92.4684	-479.193	98.529	-484.647	108.28
-416.881	75.327	-408.575	82.8795	-406.557	97.903	-388.398	98.216	-374.275	101.972			-421.577	76.1691	-411.618	81.2824	-418.257	78.4937	-408.575	82.8795	-401.66	88.2563
-340.887	67.196	-341.992	71.2989	-331.904	79.1236	-329.887	81.3146	-315.763	83.1925			-345.228	66.5	-345.228	68.705	-345.228	66.8445	-341.992	71.2989	-338.589	76.6101
-258.379	61.847	-257.251	65.3521	-251.198	68.482	-243.127	69.734	-239.092	71.6119			-262.241	62.5	-262.241	64.0297	-265.56	61.7051	-257.251	65.3521	-255.602	68.679
-195.413	59.707	-194.704	61.5962	-192.686	64.4131	-196.721	65.9781	-190.668	67.23			-192.531	59.7	-195.851	60.2895	-192.531	58.8932	-194.704	61.5962	-189.212	64.9387
-128.104	57.354	-126.103	59.0923	-118.033	60.9703	-120.05	62.5352	-118.033	63.4742			-129.461	57.6	-126.141	58.4088	-126.141	56.5483	-126.103	59.0923	-122.822	61.6636
-54.281	56.712	-53.4678	57.2144	-63.5561	59.4053	-65.5738	60.9703	-67.5914	61.5962			-49.7925	56.6	-49.7925	56.061	-53.112	55.1317	-53.4678	57.2144	-66.39	60.717
-17.37	56.498	-23.203	57.5274	-25.2207	58.7793	-27.2383	60.0313	-29.256	60.9703			-23.2365	56.3	-19.917	56.0523	-23.2365	55.123	-23.203	57.5274	-23.2365	59.7742
17.37	56.498	23.203	57.5274	25.2207	58.7793	27.2383	60.0313	29.256	60.9703			23.2365	56.6	19.917	56.0523	23.2365	55.123	23.203	57.5274	23.2365	59.7742
54.281	56.712	53.4678	57.2144	63.5561	59.4053	65.5738	60.9703	67.5914	61.5962			49.7925	56.3	49.7925	56.061	53.112	55.1317	53.4678	57.2144	66.39	60.717
128.104	57.354	126.103	59.0923	118.033	60.9703	120.05	62.5352	118.033	63.4742			129.461	57.6	126.141	58.4088	126.141	56.5483	126.103	59.0923	122.822	61.6636
195.413	59.707	194.704	61.5962	192.686	64.4131	196.721	65.9781	190.668	67.23			192.531	59.7	195.851	60.2895	192.531	58.8932	194.704	61.5962	189.212	64.9387
258.379	61.847	257.251	65.3521	251.198	68.482	243.127	69.734	239.092	71.6119			262.241	62.5	262.241	64.0297	265.56	61.7051	257.251	65.3521	255.602	68.679
340.887	67.196	341.992	71.2989	331.904	79.1236	329.887	81.3146	315.763	83.1925			345.228	66.5	345.228	68.705	345.228	66.8445	341.992	71.2989	338.589	76.6101
416.881	75.327	408.575	82.8795	406.557	97.903	388.398	98.216	374.275	101.972			421.577	76.1691	411.618	81.2824	418.257	78.4937	408.575	82.8795	401.66	88.2563
475.505	88.164	479.193	98.529	491.299	120.125	456.999	120.751	434.805	126.698			501.245	90.1457	484.647	94.792	491.286	92.4684	479.193	98.529	484.647	108.28
555.841	106.146	559.899	126.385	565.952	150.172	543.758	160.188	517.528	164.57			570.954	114.352	567.635	121.793	570.954	118.073	559.899	126.385	551.037	131.09
606.239	124.324	606.305	143.599	624.464	170.516	606.305	189.296	588.146	195.243			617.427	129.249	610.788	137.619	610.788	133.898	606.305	143.599	600.83	153.896
687.034	149.358	689.029	179.906	693.064	202.441	697.1	222.786	689.029	244.695			687.137	157.176	687.137	170.665	690.456	164.619	689.029	179.906	683.817	190.199
